**Title:** Is Footedness Driving Right Lower Extremity Arthroplasty Becoming Commoner Than Left Lower Extremity Arthroplasty?

**Keywords:** Footedness; Hip Arthroplasty; Knee Arthroplasty; Driving

**Author:** Deepak Gupta, MD, Clinical Assistant Professor, Anesthesiology

**Institution:** Wayne State University/Detroit Medical Center  
Detroit, Michigan, United States

**Financial Support:** None

**Conflicts of Interests:** None

**Corresponding Author:**

Dr Deepak Gupta

Clinical Assistant Professor, Anesthesiology

Wayne State University/Detroit Medical Center

Box No 162,

3990 John R, Detroit, MI 48201, United States

Ph: 1-313-745-7233

Fax: 1-313-993-3889

Email: [dgupta@med.wayne.edu](mailto:dgupta@med.wayne.edu)

## **Acknowledgement**

The author is indebted to Shushovan Chakraborty, MD, PhD, Department of Anesthesiology and Pain Medicine, Wayne State University, Detroit, Michigan, United States, for introducing the thought of footedness into my scientific quest and its exploration.

## Abstract

The question arises whether footedness transforms into asymmetrical incidence of wear and tear within lower extremity joints. After obtaining institutional review board approval for exempt research, the author manually counted the number of patients who underwent right or left or bilateral, hip or knee, primary or revision arthroplasty over a five-year period (2016-2020) at a university-affiliated hospital in the United States. Overall, right lower extremity arthroplasty was significantly commoner than left lower extremity arthroplasty ( $P=0.002$ ). Individually, only right primary hip arthroplasty ( $P=0.033$ ) and right revision knee arthroplasty ( $P=0.041$ ) were significantly commoner procedures than their left counterparts. These results should set up the stage for future investigations into footedness retrospectively and prospectively to rule out if commoner right footedness in itself is driving this asymmetrical incidence of lower extremity arthroplasty or whether automatic transmission vehicular driving is independently contributing to this asymmetrical incidence.

## **Introduction**

Unlike commonly discussed handedness, footedness is rarely discussed in scientific literature and common media [1-3]. The question arises whether footedness transforms into asymmetrical incidence of wear and tear within lower extremity joints. If that is true, thence the question arises whether left lower extremity only idling and right lower extremity only moving while driving automatic transmission vehicles aggravate such asymmetrical incidence of wear and tear within lower extremity joints [4]. Interestingly, the idea of overuse related wear and tear of joints has been challenged by the idea of disuse related weakening of muscles and bones supporting joints [5-6]. Overall, a simple first step for this inquisition is whether lower extremity arthroplasty is significantly commoner on one side.

## Methods

After obtaining institutional review board approval for exempt research, the author manually counted the number of patients who underwent right or left or bilateral, hip or knee, primary or revision arthroplasty over a five-year period (2016-2020) at a university-affiliated hospital in the United States. The manual counting was done on the onscreen “Case Selection” section in Cerner PowerChart. Only completed cases were counted with case completion indicated by presence of documented surgery stop dates/times on the onscreen “Case Selection” section in Cerner PowerChart.

## Results

Out of 31247 orthopedic and non-orthopedic cases boarded in the onscreen “Case Selection” section in Cerner PowerChart over the five-year period (2016-2020), 4690 completed lower extremity arthroplasty cases were manually counted by the author. Their yearly distribution as depending on side, site and type is depicted in Figure 1. After adding the number of bilateral primary knee arthroplasty (n=34) into both right primary knee arthroplasty as well as left primary knee arthroplasty, the cumulative numbers of lower extremity arthroplasty for the five-year period were tabulated as depicted in Table 1. Overall, right lower extremity arthroplasty was significantly commoner than left lower extremity arthroplasty ( $P=0.002$ ) per 2x1 Chi-Square analysis. Individually, only right primary hip arthroplasty ( $P=0.033$ ) and right revision knee arthroplasty ( $P=0.041$ ) were significantly commoner procedures than their left counterparts per 2x1 Chi-Square analysis.

## Discussion

The author's null hypothesis about symmetrical incidence of arthroplasty in lower extremity was rejected by commoner incidence of right lower extremity arthroplasty. These results should set up the stage for future investigations into footedness retrospectively and prospectively to rule out if commoner right footedness in itself is driving this asymmetrical incidence of lower extremity arthroplasty or whether automatic transmission vehicles' driving is independently contributing to this asymmetrical incidence.

There were some study limitations. The multi-thousand patients' data was only superficially and manually counted to decipher just the cumulative numbers of lower extremity arthroplasty over the five-year period. Comprehensive retrospective chart review of 4690 cases could not be planned by the lone author-researcher. Future retrospective and prospective studies by larger research teams may be able to address this logistical limitation.

Table 1: Comparison Among Lower Extremity Arthroplasty: Right-Sided Vs. Left-Sided

| <b>Arthroplasty</b>   | <b>Cumulative Numbers for 5-Years<br/>(2016-2020)</b> | <b>P-Value</b> |
|-----------------------|-------------------------------------------------------|----------------|
| Right HIP Primary     | 820                                                   | <b>0.033</b>   |
| Left HIP Primary      | 736                                                   |                |
| Right HIP Revision    | 125                                                   | 0.237          |
| Left HIP Revision     | 107                                                   |                |
| Right KNEE Primary    | 1322                                                  | 0.15           |
| Left KNEE Primary     | 1249                                                  |                |
| Right KNEE Revision   | 202                                                   | <b>0.041</b>   |
| Left KNEE Revision    | 163                                                   |                |
| RIGHT LOWER EXTREMITY | 2469                                                  | <b>0.002</b>   |
| LEFT LOWER EXTREMITY  | 2255                                                  |                |



## References

1. van Melick N, Meddeler BM, Hoogeboom TJ, Nijhuis-van der Sanden MWG, van Cingel REH. How to determine leg dominance: The agreement between self-reported and observed performance in healthy adults. *PLoS One*. 2017;12(12):e0189876.  
doi:10.1371/journal.pone.0189876
2. Widmar A. Is Driving a Car Difficult for a Left-Handed Person?  
<https://thenewswheel.com/is-driving-a-car-difficult-for-a-left-handed-person/> Accessed October 18, 2021.
3. Xin Z. Left-Handed Drivers vs Right-Handed Drivers: Who Has it Easier?  
<https://www.motorist.sg/article/115/left-handed-drivers-vs-right-handed-drivers-who-has-it-easier> Accessed October 18, 2021.
4. Noyes Knee Institute. Common Knee Issues Associated With Long-Distance Driving.  
<https://noyeskneeinstitute.com/common-knee-issues-associated-long-distance-driving/>  
Accessed October 18, 2021.
5. Wallace IJ, Worthington S, Felson DT, et al. Knee osteoarthritis has doubled in prevalence since the mid-20th century. *Proc Natl Acad Sci U S A*. 2017;114(35):9332-9336. doi:10.1073/pnas.1703856114
6. Harris R. 6,000-Year-Old Knee Joints Suggest Osteoarthritis Isn't Just Wear And Tear.  
<https://www.npr.org/sections/health-shots/2017/08/15/543402095/creaky-knees> Accessed October 18, 2021.

**YEARLY DISTRIBUTION OF LOWER EXTREMITY ARTHROPLASTY FOR FIVE-YEAR PERIOD (2016-2020)**

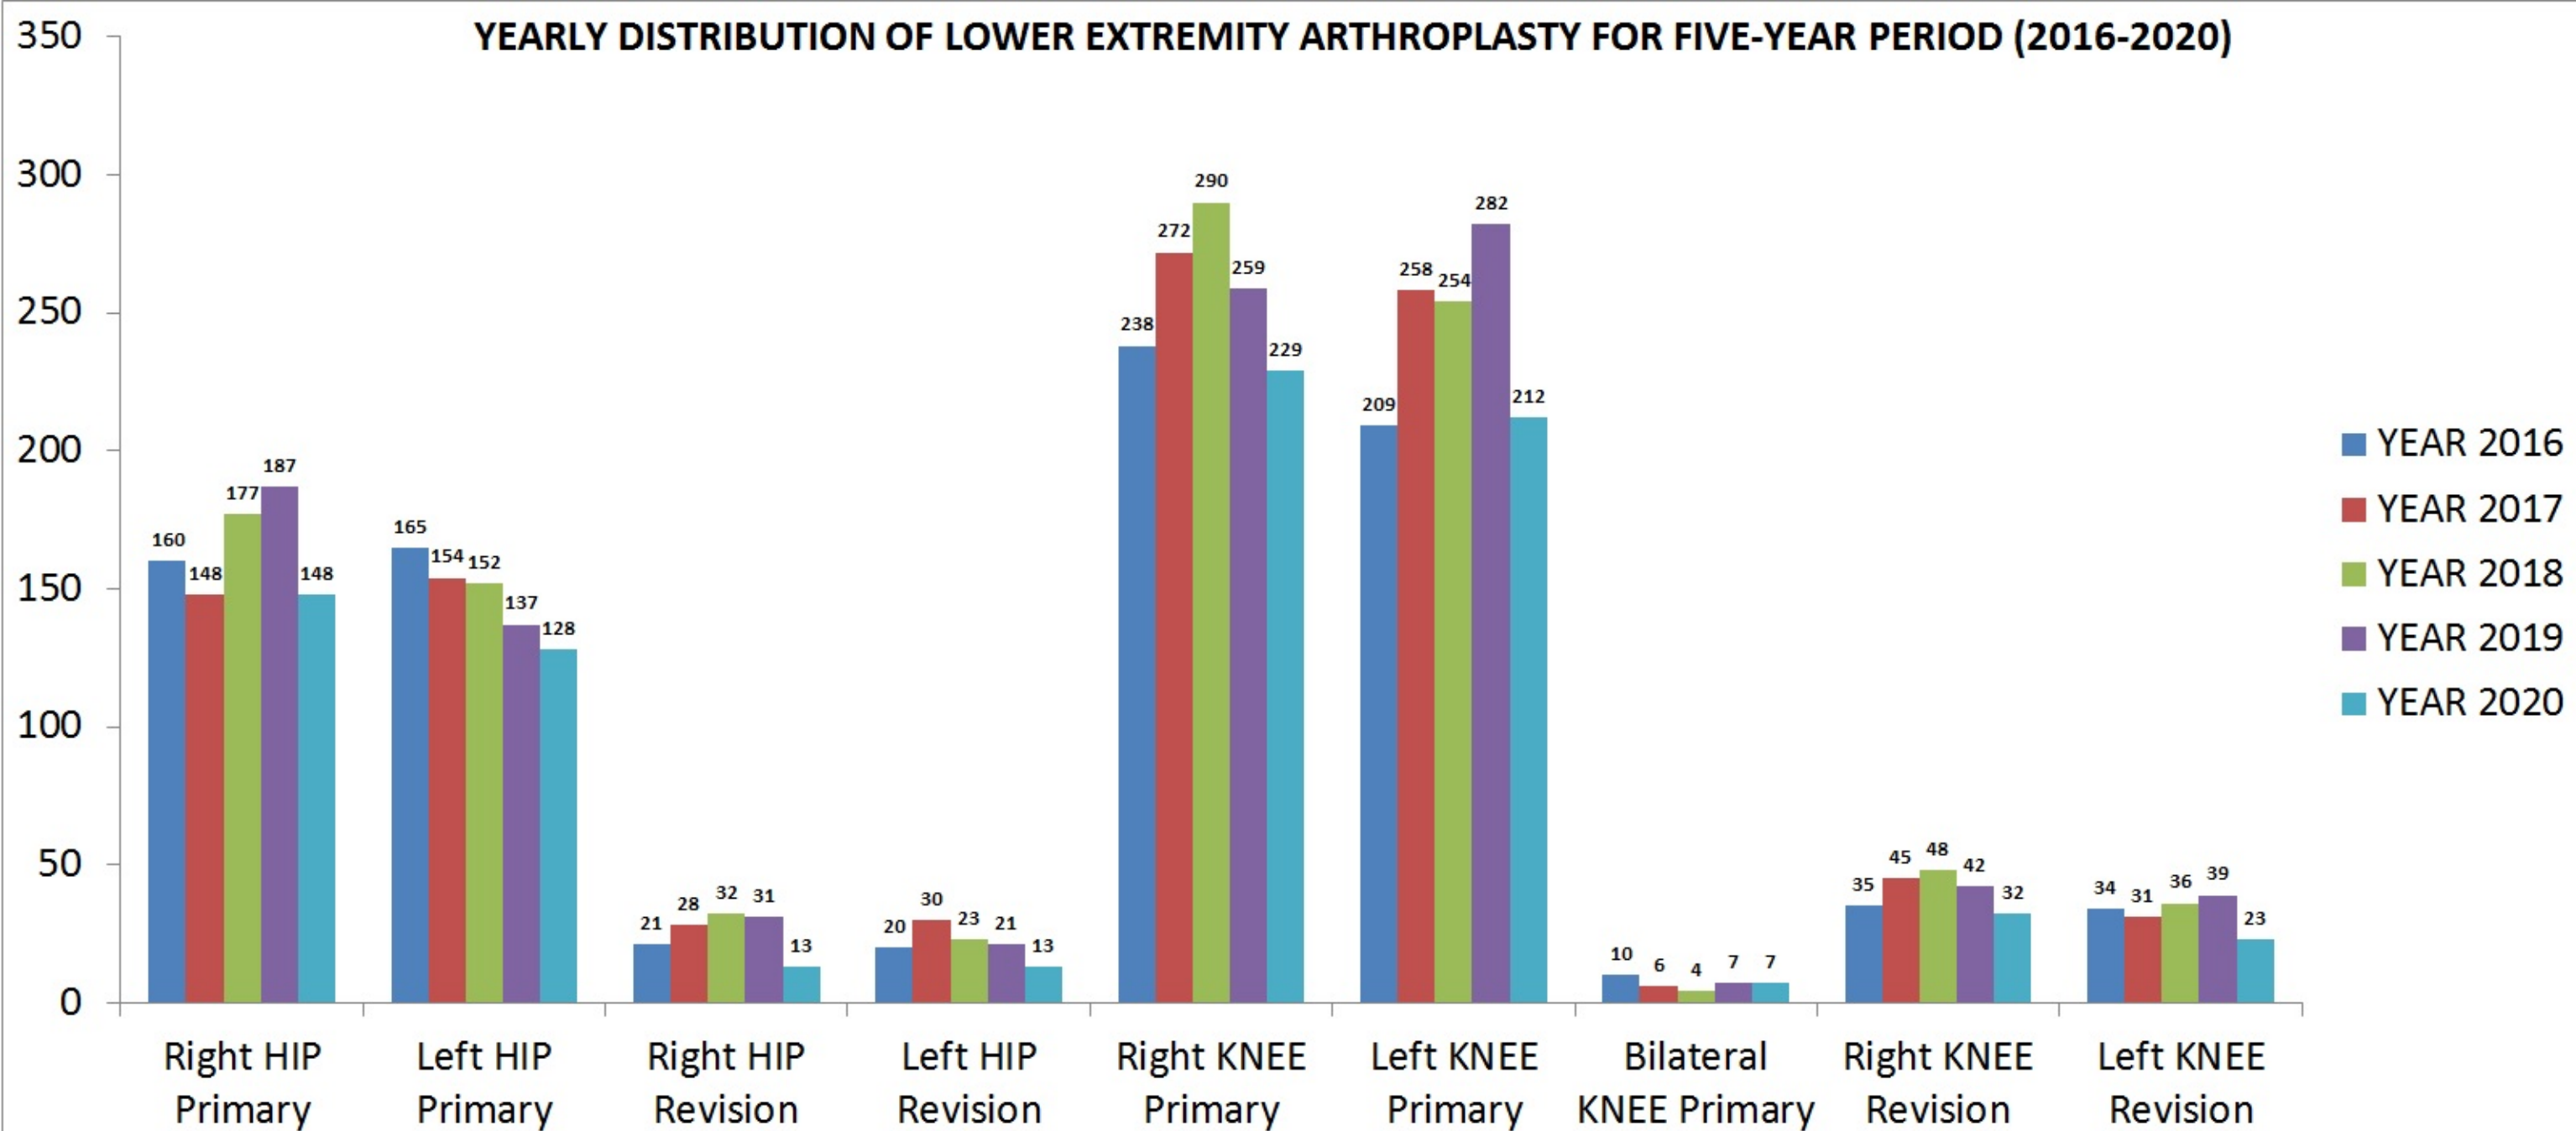

Source: https://medrxiv.org/content/10.1101/2021.11.22.21266672v1.full.pdf
